# Supplementary material for: Metabolic Hallmarks for Purine Nucleotide Biosynthesis in Small Cell Lung Carcinoma
Source: Oxford University Press journal article supplement (doi:10.1158/1541-7786.mcr-23-0386), 2023-09-29
Supplement: mcr-23-0386_figure_s5_suppsf5.pdf [file mcr-23-0386_figure_s5_suppsf5.pdf]

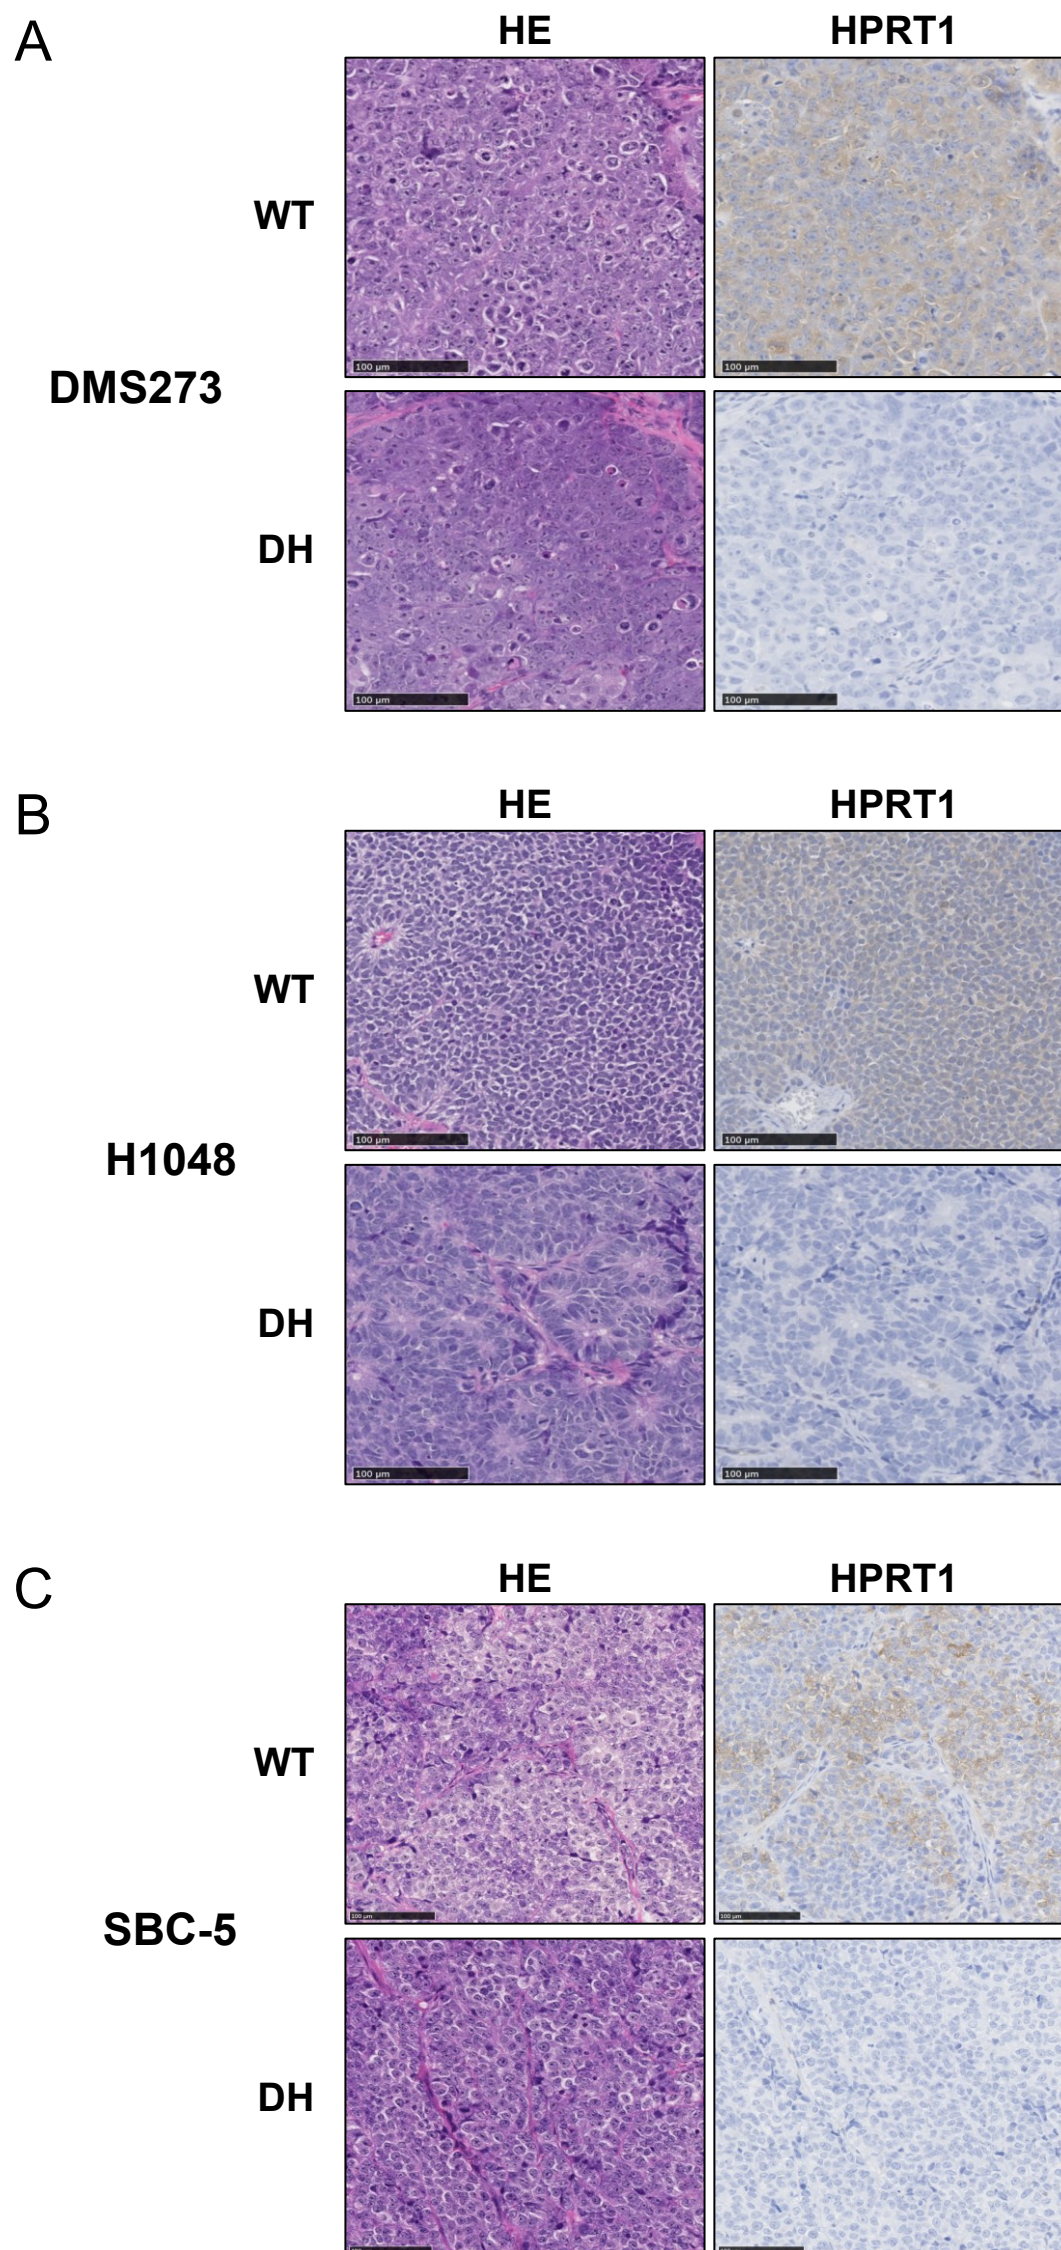

**Supplementary Figure S5. Hematoxylin/eosin and anti-HPRT1 immunohistochemistry staining to visualize HPRT1 expression**

A–C, Pathology of tumors resected from mice transplanted with DMS273 (A), H1048 (B), SBC-5 (C), and HPRT1-knockout cells. Scale bar indicates 100  $\mu$ m. Representative images are shown.
